# Supplementary material for: Treatment of wastewater from the thermal desorption of oil-contaminated soil: performance and sorption mechanism of pyrolytic modified sawdust
Source: Royal Society of Chemistry journal article supplement (doi:10.1039/d2ew00918h), 2023-01-01
Supplement: d2ew00918h1.pdf [file d2ew00918h1.pdf]

## Supplementary Material

Feng Xiao, Jun Yin

*School of Environment Science & Engineering, Zhejiang Gongshang University,  
Hangzhou, 310012, China*

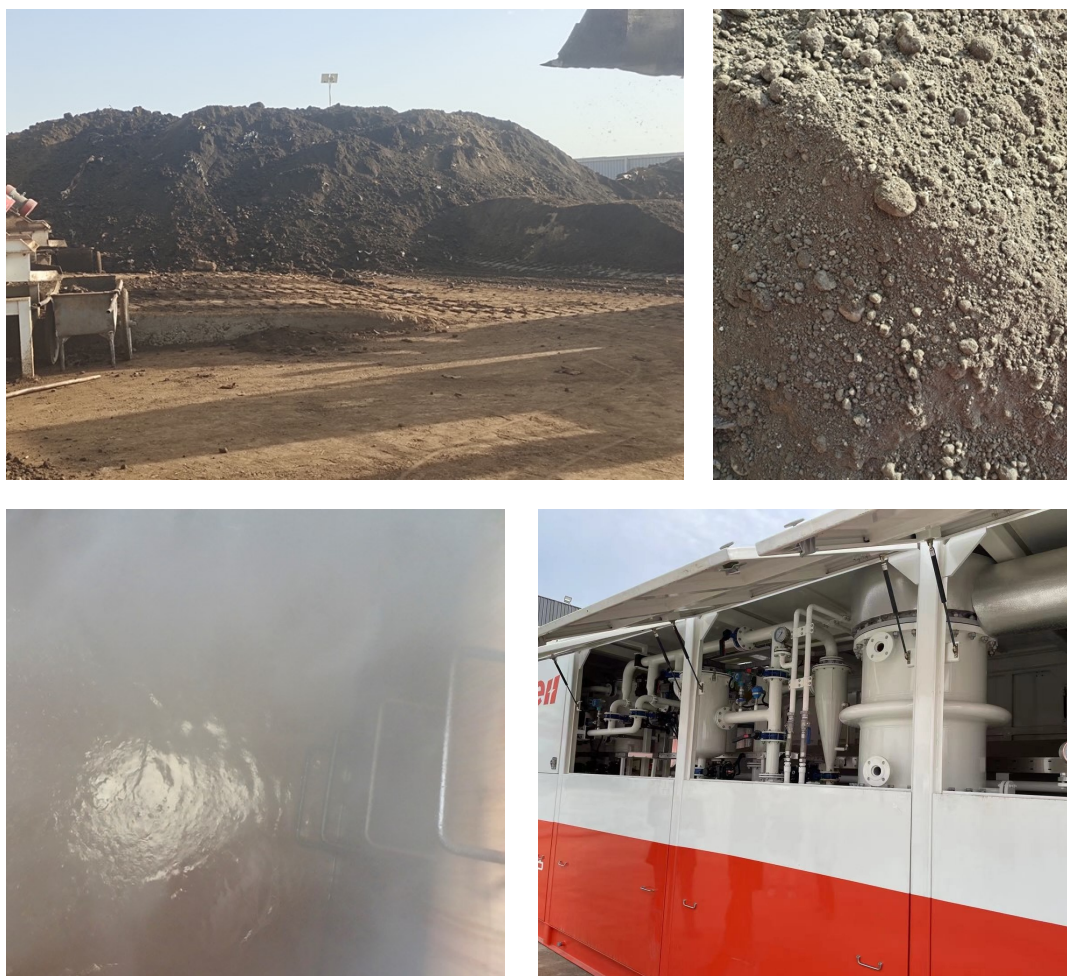

**Fig. S1.** On-site pictures in Tahe Oilfield, Xinjiang (in order are oil-contaminated soil, soil thermal desorption device and condensed wastewater)

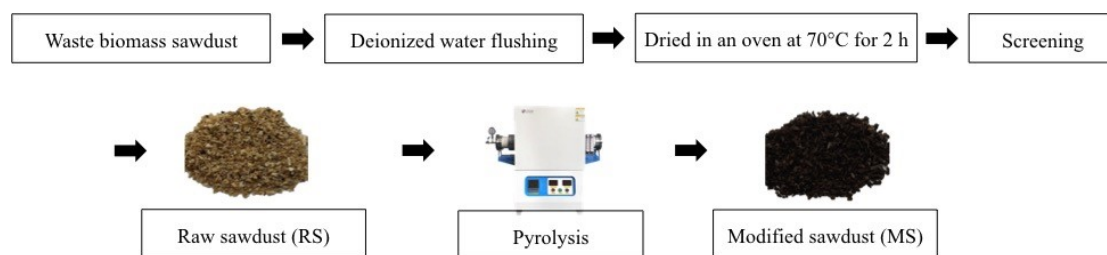

**Fig. S2.** Sawdust pyrolysis modification process

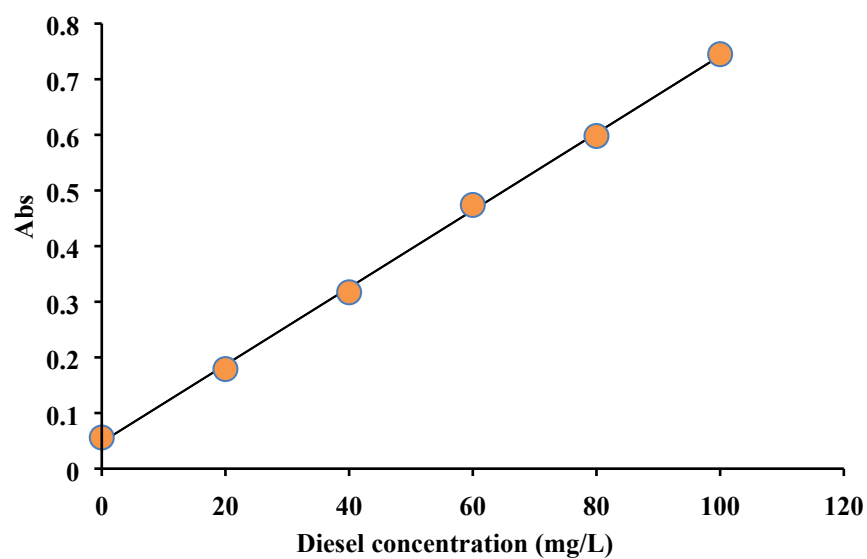

**Fig. S3.** Diesel concentration standard curve

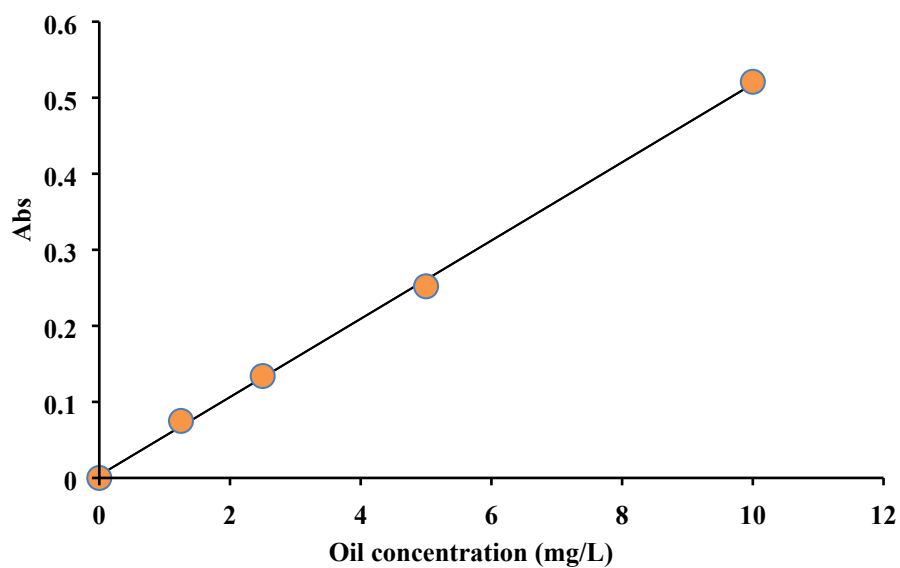

**Fig. S4.** Oil concentration standard curve

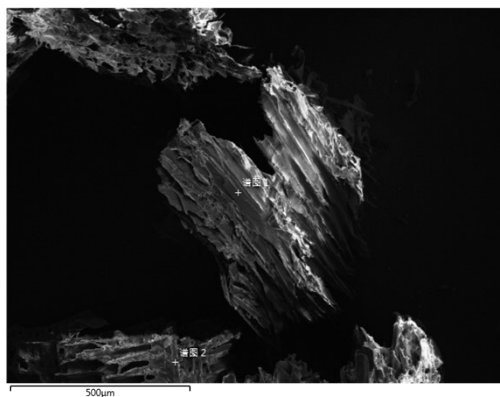

**Spectrogram1**

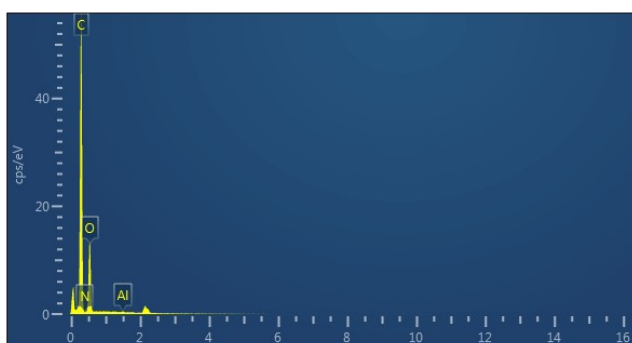

| Eelement | Line style      | Weight<br>percentage | Wt % Sigma | Atomic<br>percentage |
|----------|-----------------|----------------------|------------|----------------------|
| C        | K linear system | 66.52                | 0.39       | 72.61                |
| O        | K linear system | 33.35                | 0.39       | 27.33                |
| N        | K linear system | 0.00                 | 1.33       | 0.00                 |
| Al       | K linear system | 0.12                 | 0.04       | 0.06                 |

**Spectrogram2**

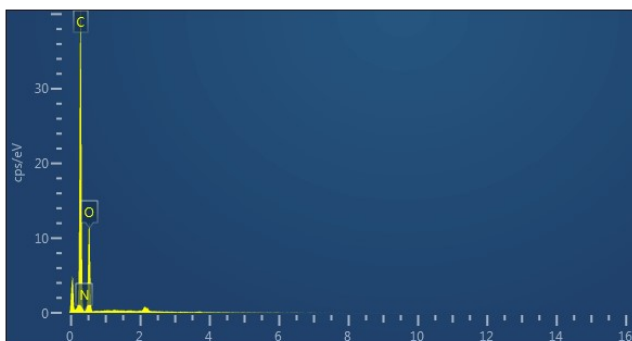

| Eelement | Line style | Weight<br>percentage | Wt % Sigma | Atomic<br>percentage |
|----------|------------|----------------------|------------|----------------------|
|----------|------------|----------------------|------------|----------------------|

|    |                 |       |      |       |
|----|-----------------|-------|------|-------|
| C  | K linear system | 63.84 | 0.36 | 70.23 |
| O  | K linear system | 35.97 | 0.36 | 29.71 |
| N  | K linear system | 0.00  | 1.78 | 0.00  |
| Ca | K linear system | 0.19  | 0.04 | 0.06  |

**Fig. S5.** EDS of raw sawdust

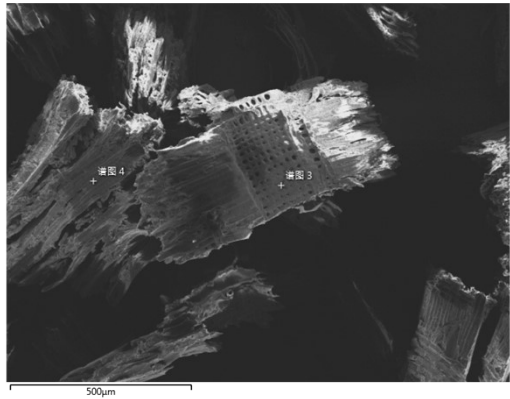

**Spectrogram1**

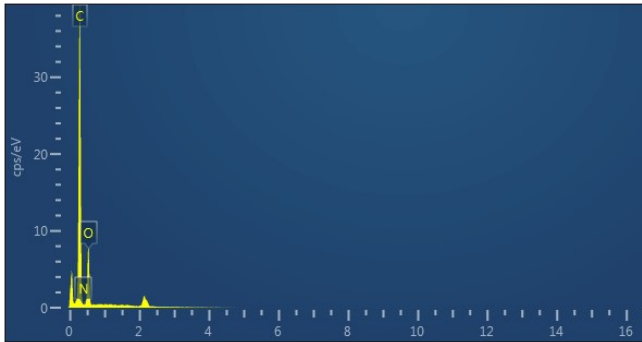

| Eelement | Line style      | Weight<br>percentage | Wt % Sigma | Atomic<br>percentage |
|----------|-----------------|----------------------|------------|----------------------|
| C        | K linear system | 69.77                | 0.48       | 75.45                |
| O        | K linear system | 30.23                | 0.48       | 24.55                |
| N        | K linear system | 0.00                 | 1.81       | 0.00                 |

**Spectrogram2**

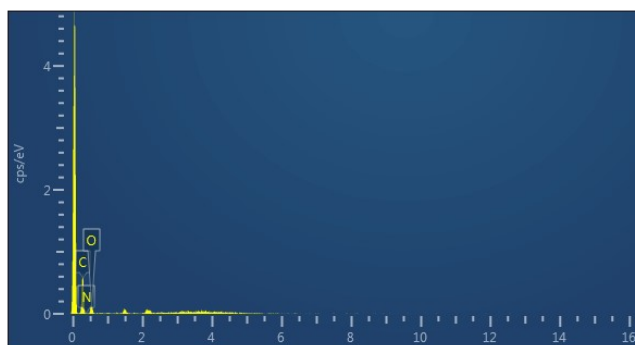

| Eelement | Line style      | Weight<br>percentage | Wt % Sigma | Atomic<br>percentage |
|----------|-----------------|----------------------|------------|----------------------|
| C        | K linear system | 69.77                | 3.09       | 75.45                |
| O        | K linear system | 31.93                | 3.09       | 26.04                |
| N        | K linear system | 0.00                 | 10.40      | 0.00                 |

**Fig. S6.** EDS of MS

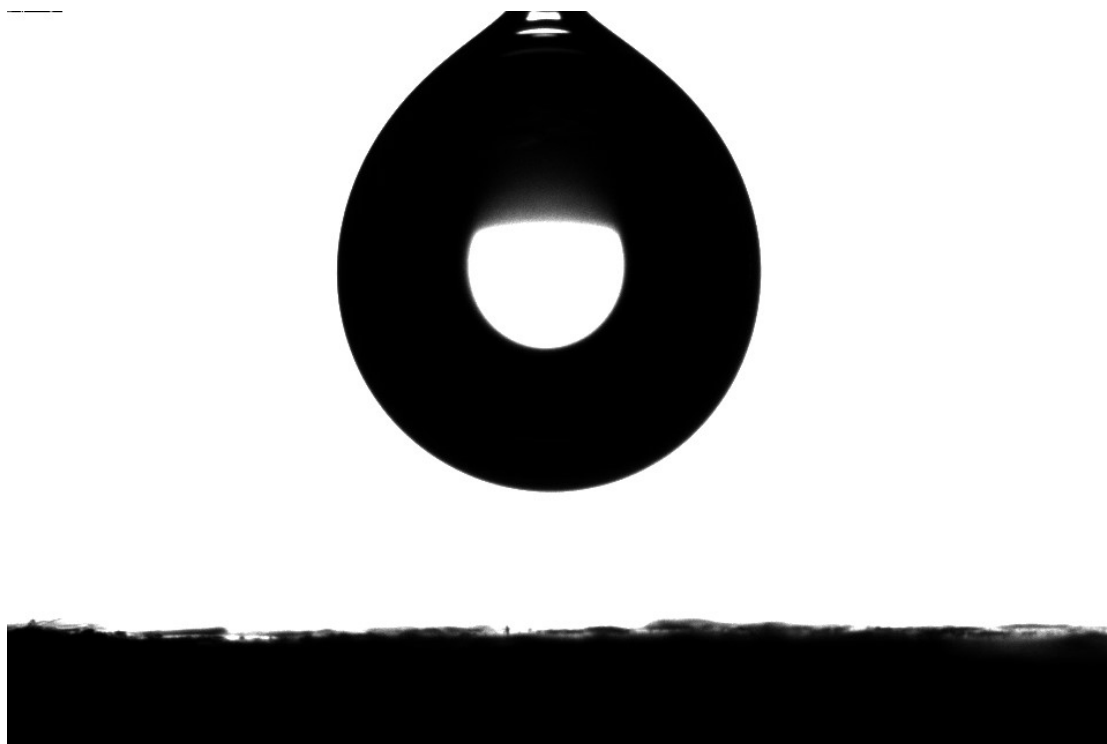

**Videos S1.** Dynamic water contact Angle of RS

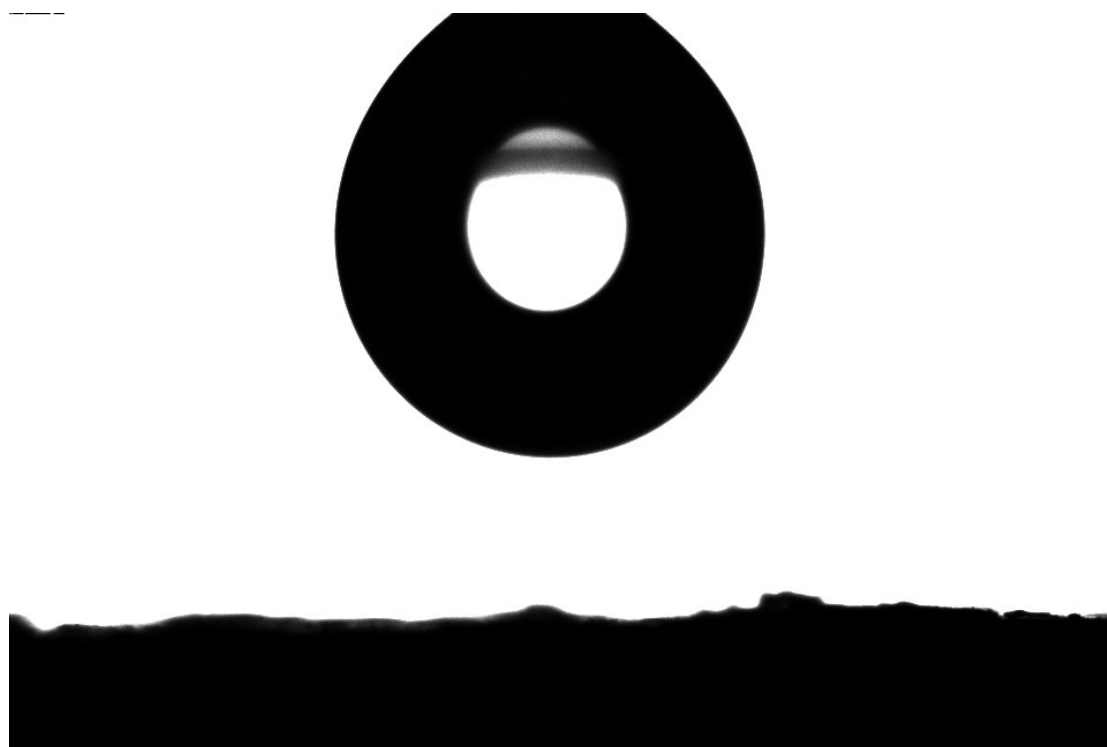

**Videos S2.** Dynamic water contact Angle of MS

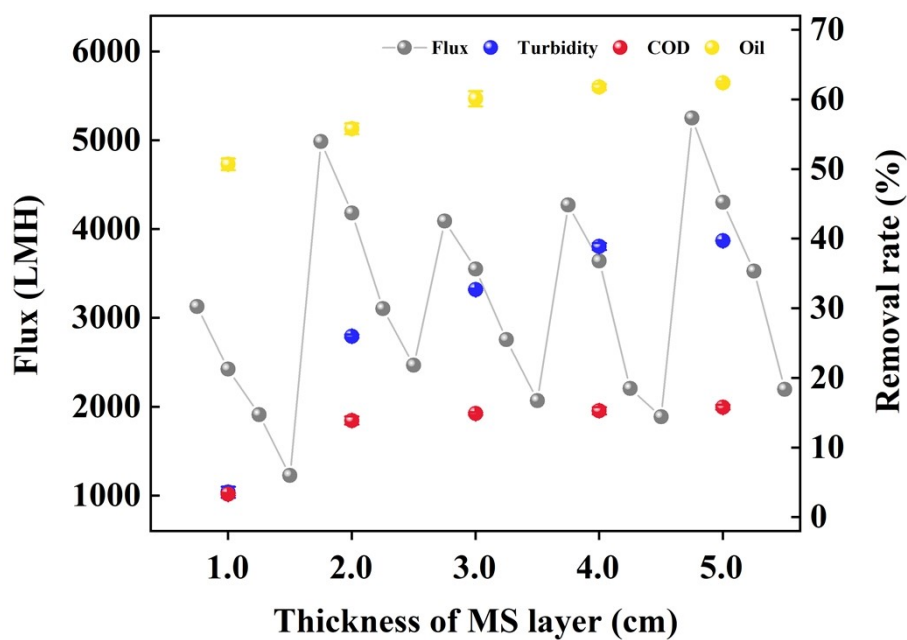

**Fig. S7.** Influence of MS layer thickness on flux, removal rates of turbidity, COD and oil.

**Table S1**

Main water quality parameters of wastewater from TD of an oil-contaminated soil in Tahe, Xinjiang, China

| Parameters             | Value       | Parameters | Value       |
|------------------------|-------------|------------|-------------|
| COD                    | 9724 (mg/L) | As         | 92.1 (μg/L) |
| NH <sub>3</sub> -N     | 252 (mg/L)  | Hg         | 1.37 (μg/L) |
| Turbidity              | 596 (NTU)   | Cu         | 0.02 (mg/L) |
| Oil content            | 1377 (mg/L) | Cr         | 0.06 (mg/L) |
| Petroleum hydrocarbons | 818 (mg/L)  | Mn         | 1.01 (mg/L) |
| pH                     | 7.8         | Se         | 2.5 (μg/L)  |

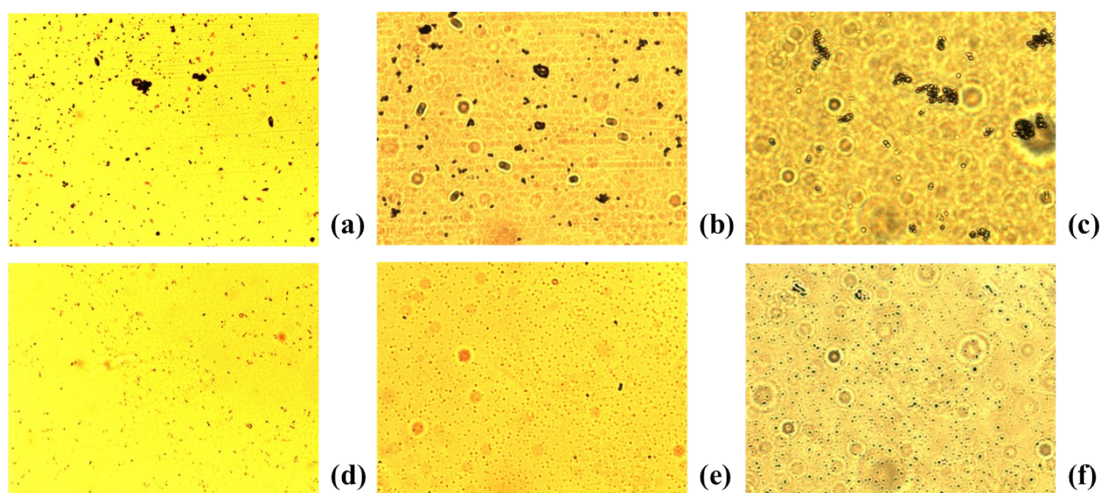

**Fig. S8.** Optical microscope photos of TDW before (a-c) and after (d-f) MS layer treatment. (a,d: Magnified 40 times; b,e: Magnified 100 times; c,f: Magnified 200 times)

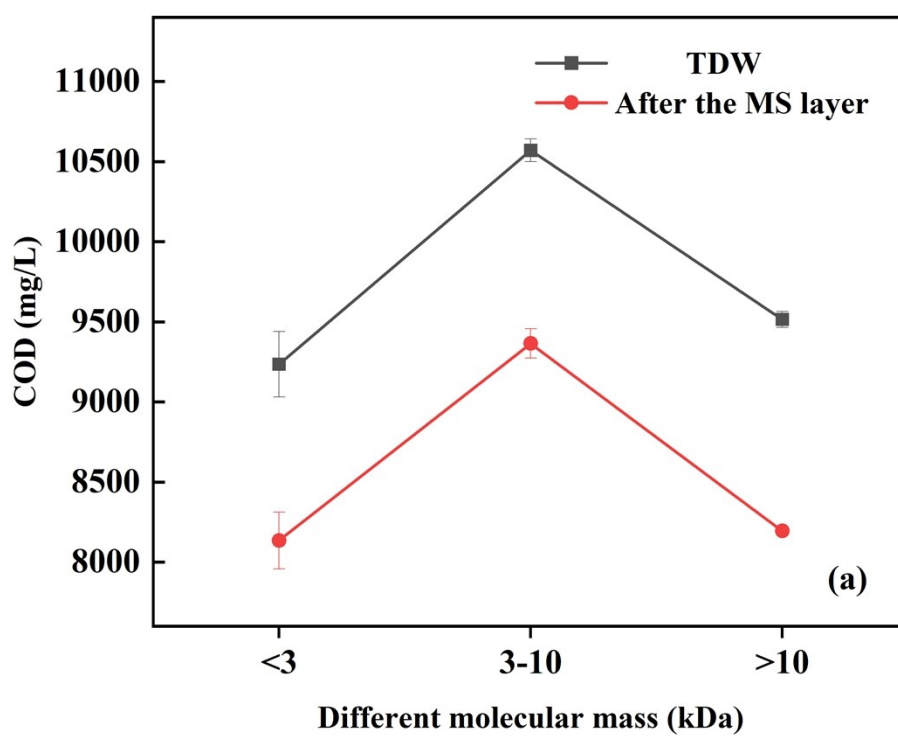

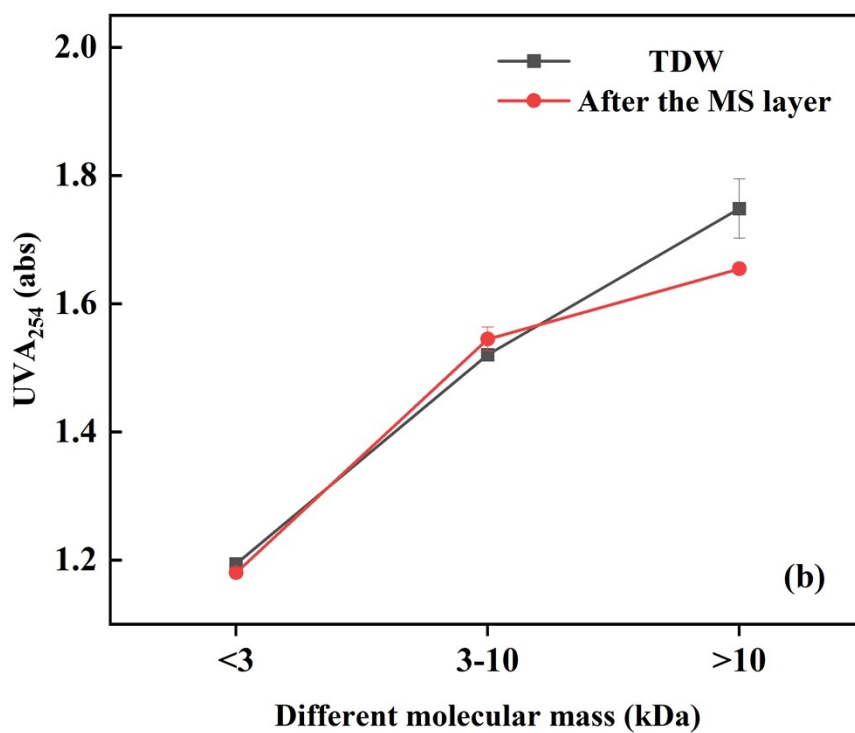

**Fig. S9.** Different molecular mass distributions of the (a) COD and (b) UV254

**Table S2.** The Zeta and size distribution of TDW before and after MS layer treatment

|                    | Zeta (mV) | Conductivity<br>(mS/cm) | Z-average Size<br>(d.nm) | Pdl   |
|--------------------|-----------|-------------------------|--------------------------|-------|
| TDW                | -7.98     | 25.03                   | 4187                     | 0.686 |
| After the MS layer | -6.89     | 32.73                   | 1215                     | 0.033 |

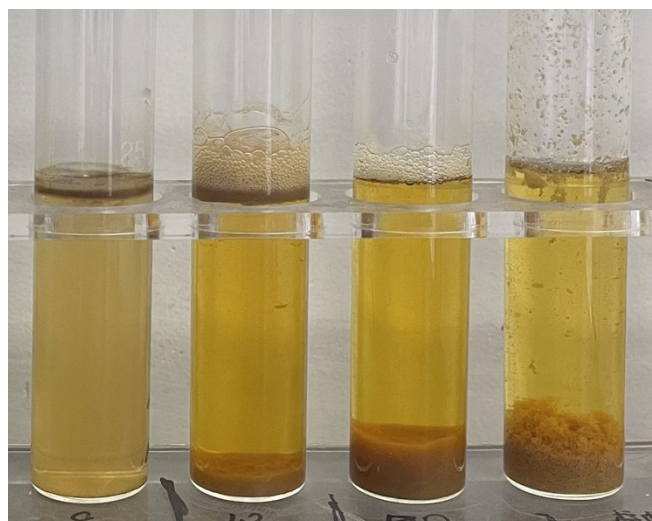

**Fig. S10.** Effect drawing of wastewater treatment in DF process (from left to right, NaClO, CaCl<sub>2</sub>, PAC and PAM are added in order)

**Table S3.** Orthogonal experimental design table for the treatment effect of DF on COD, turbidity and oil concentration

| Factors | NaClO (ml/L) | CaCl <sub>2</sub> (g/L) | PAC (g/L) | PAM (g/L) |  |  |  |
|---------|--------------|-------------------------|-----------|-----------|--|--|--|
| A       | 20           | 2                       | 2         | 1         |  |  |  |
| B       | 30           | 4                       | 4         | 2         |  |  |  |
| C       | 40           | 6                       | 6         | 3         |  |  |  |

  

| NO. | NaClO (ml/L) | CaCl <sub>2</sub> (g/L) | PAC (g/L) | PAM (g/L) | COD (%) | Turbidity (%) | Oil concentration (%) |
|-----|--------------|-------------------------|-----------|-----------|---------|---------------|-----------------------|
| 1   | 20           | 2                       | 2         | 1         | 9.5     | 96.8          | 59.3                  |
| 2   | 20           | 4                       | 4         | 2         | 15.3    | 97.6          | 64.3                  |
| 3   | 20           | 6                       | 6         | 3         | 12.7    | 97.1          | 65.3                  |
| 4   | 30           | 2                       | 4         | 3         | 10.8    | 94.5          | 63.9                  |
| 5   | 30           | 4                       | 6         | 1         | 11.5    | 97.4          | 57.7                  |
| 6   | 30           | 6                       | 2         | 2         | 7.6     | 97.3          | 63.3                  |
| 7   | 40           | 2                       | 6         | 2         | 10.8    | 91.2          | 59.9                  |
| 8   | 40           | 4                       | 2         | 3         | 10.2    | 95.6          | 56.8                  |
| 9   | 40           | 6                       | 4         | 1         | 14.0    | 97.0          | 61.4                  |
| K1  | 37.5         | 31.2                    | 27.4      | 35.0      |         |               |                       |
|     | 291.6        | 282.6                   | 289.7     | 291.3     |         |               |                       |

|          |       |       |       |       |
|----------|-------|-------|-------|-------|
|          | 188.8 | 183.1 | 179.4 | 178.4 |
|          | 29.9  | 36.9  | 40.1  | 33.7  |
| K2       | 289.3 | 290.6 | 289.1 | 286.1 |
|          | 184.9 | 178.8 | 189.6 | 187.5 |
|          | 35.0  | 34.4  | 35.0  | 33.7  |
| K3       | 283.8 | 291.4 | 285.8 | 287.3 |
|          | 178.1 | 189.9 | 182.9 | 186.0 |
|          | 12.5  | 10.4  | 9.1   | 11.7  |
| k1       | 97.2  | 94.2  | 96.6  | 97.1  |
|          | 62.9  | 61.0  | 59.8  | 59.5  |
|          | 10.0  | 12.3  | 13.4  | 11.2  |
| k2       | 96.4  | 96.9  | 96.4  | 95.4  |
|          | 61.6  | 59.6  | 63.2  | 62.5  |
|          | 11.7  | 11.5  | 11.7  | 11.2  |
| k3       | 94.6  | 97.1  | 95.6  | 95.8  |
|          | 59.4  | 63.3  | 61.0  | 62.0  |
|          | 2.5   | 1.9   | 4.2   | 0.4   |
| R        | 2.6   | 3.0   | 1.3   | 1.7   |
|          | 3.6   | 3.7   | 3.4   | 3.0   |
| Signific | 2     | 3     | 1     | 4     |
| ance     | 2     | 1     | 3     | 4     |
| order    | 2     | 1     | 3     | 4     |

**DF experiment steps:** DF experiments were performed using a jar test apparatus.

Each sample to be coagulated was added with NaClO and placed under a state of rapid stirring (250 rpm). CaCl<sub>2</sub> was slowly added after stirring for 60 s. After adding PAC, the flocculant was stirred slowly for 5 min at a speed of 50 rpm. At the last stage, PAM was added to make the flocculant settle for 30 min. The supernatant obtain

**Table S4** Comparison of treatment efficiencies between Demulsification and flocculation (DF) and Modified sawdust (MS).

| Methods                                  | Turbidity<br>removal rate<br>(%) | COD<br>removal rate<br>(%) | Oil removal<br>rate (%) | Solid waste<br>production<br>(g/L) |
|------------------------------------------|----------------------------------|----------------------------|-------------------------|------------------------------------|
| Demulsification and<br>flocculation (DF) | 97.6                             | 15.3                       | 65.3                    | 5.61                               |
| Modified sawdust (MS)                    | 99.0                             | 24.8                       | 82.6                    | 0.35                               |
